# Supplementary material
Source: PubMed Central journal article supplement (PMC2633426)
Supplement: NIHMS85339-supplement-1.pdf [file NIHMS85339-supplement-1.pdf]

**Table S1a.** Haplotypes and substitution sites in the D-loop region (between 1-613 bp) of mtDNA of indigenous Chicken. Horizontal dotted lines separate haplogroups A-F, respectively.

|           |    | Sequence Position (according to GenBank Accession NC_001323) |    |    |     |     |     |     |     |     |     |     |     |     |     |     |     |     |     |     |     |     |     |     |     |     |     |     |     |     |     |     |     |     |     |     |     |     |     |     |     |     |     |     |   |   |   |   |   |   |   |   |
|-----------|----|--------------------------------------------------------------|----|----|-----|-----|-----|-----|-----|-----|-----|-----|-----|-----|-----|-----|-----|-----|-----|-----|-----|-----|-----|-----|-----|-----|-----|-----|-----|-----|-----|-----|-----|-----|-----|-----|-----|-----|-----|-----|-----|-----|-----|-----|---|---|---|---|---|---|---|---|
| Haplotype | 92 | 94                                                           | 95 | 96 | 164 | 196 | 207 | 209 | 214 | 218 | 219 | 221 | 222 | 238 | 239 | 240 | 241 | 243 | 246 | 253 | 258 | 278 | 280 | 288 | 293 | 299 | 303 | 306 | 307 | 312 | 319 | 327 | 339 | 341 | 352 | 360 | 364 | 388 | 396 | 443 | 451 | 518 | 567 | 595 |   |   |   |   |   |   |   |   |
| GenBank   | A  | C                                                            | A  | C  | C   | T   | T   | G   | T   | C   | A   | T   | T   | A   | G   | T   | T   | C   | A   | T   | C   | A   | A   | A   | C   | C   | T   | T   | C   | C   | T   | C   | T   | C   | A   | A   | T   | C   | T   | C   | G   | C   | T   | A   | C | T |   |   |   |   |   |   |
| SLvtHap1  | .  | .                                                            | .  | .  | T   | .   | C   | .   | C   | .   | .   | .   | C   | .   | .   | C   | .   | .   | .   | C   | T   | .   | .   | .   | .   | .   | .   | .   | T   | .   | .   | .   | .   | .   | .   | .   | .   | .   | .   | .   | .   | .   | .   | T   | . | . | . | . |   |   |   |   |
| SLvtHap2  | C  | T                                                            | .  | .  | T   | .   | C   | .   | C   | .   | .   | .   | C   | .   | .   | C   | .   | .   | .   | C   | T   | .   | .   | .   | .   | .   | .   | T   | .   | .   | .   | .   | .   | .   | .   | .   | .   | .   | .   | .   | .   | .   | .   | T   | . | . | . | . |   |   |   |   |
| SLvtHap3  | C  | T                                                            | .  | T  | T   | .   | C   | .   | C   | .   | .   | .   | C   | .   | .   | C   | .   | .   | .   | C   | T   | .   | .   | .   | .   | .   | .   | T   | .   | .   | .   | .   | .   | .   | .   | .   | .   | .   | .   | .   | .   | .   | .   | T   | . | . | . | . |   |   |   |   |
| SLvtHap4  | .  | T                                                            | .  | .  | T   | .   | C   | .   | C   | .   | .   | .   | C   | .   | .   | C   | .   | .   | .   | C   | T   | .   | .   | .   | .   | .   | .   | T   | .   | .   | .   | .   | .   | .   | .   | .   | .   | .   | .   | .   | .   | .   | .   | T   | . | . | . | . |   |   |   |   |
| SLvtHap5  | .  | .                                                            | .  | .  | T   | .   | C   | .   | C   | .   | .   | .   | C   | .   | .   | C   | .   | .   | .   | C   | T   | .   | .   | C   | .   | .   | .   | T   | .   | .   | .   | .   | .   | .   | .   | .   | .   | .   | .   | .   | .   | .   | T   | .   | G | . | . |   |   |   |   |   |
| SLvtHap6  | .  | .                                                            | T  | T  | T   | .   | C   | .   | C   | .   | .   | .   | C   | .   | .   | C   | .   | .   | .   | C   | T   | .   | .   | .   | .   | .   | .   | T   | .   | .   | .   | .   | .   | .   | .   | .   | .   | .   | .   | .   | .   | .   | T   | .   | G | . | . |   |   |   |   |   |
| SLvtHap7  | .  | .                                                            | .  | T  | T   | .   | C   | .   | C   | .   | .   | .   | C   | .   | .   | C   | .   | .   | .   | C   | T   | .   | .   | .   | .   | .   | .   | T   | .   | .   | .   | .   | .   | .   | .   | .   | .   | .   | .   | .   | .   | .   | T   | .   | . | . | . |   |   |   |   |   |
| SLvtHap8  | .  | .                                                            | .  | .  | T   | C   | C   | .   | C   | .   | .   | .   | C   | .   | .   | C   | .   | .   | .   | C   | T   | .   | .   | .   | .   | .   | .   | T   | .   | .   | .   | .   | .   | .   | .   | .   | .   | .   | .   | .   | .   | .   | T   | .   | . | . | . |   |   |   |   |   |
| SLvtHap9  | .  | .                                                            | T  | .  | T   | C   | C   | .   | C   | .   | .   | .   | C   | .   | .   | C   | .   | .   | .   | C   | T   | .   | .   | .   | .   | .   | .   | T   | .   | .   | .   | .   | .   | .   | .   | .   | .   | .   | .   | .   | .   | .   | T   | .   | . | . | . |   |   |   |   |   |
| SLvtHap10 | .  | .                                                            | .  | .  | T   | .   | C   | .   | C   | .   | .   | C   | C   | .   | .   | C   | .   | T   | .   | C   | T   | .   | .   | .   | .   | .   | .   | T   | .   | .   | .   | .   | .   | .   | .   | .   | .   | .   | .   | .   | .   | T   | A   | .   | . | . | . |   |   |   |   |   |
| SLvtHap11 | .  | .                                                            | .  | .  | T   | .   | C   | .   | C   | .   | .   | C   | C   | .   | .   | C   | .   | T   | .   | C   | T   | .   | .   | .   | .   | .   | .   | T   | .   | .   | .   | .   | .   | .   | .   | .   | .   | .   | .   | .   | .   | .   | T   | .   | . | . | . |   |   |   |   |   |
| SLvtHap12 | .  | .                                                            | .  | .  | T   | .   | C   | .   | C   | .   | .   | C   | C   | .   | .   | C   | .   | T   | .   | C   | T   | .   | .   | .   | .   | .   | .   | T   | .   | .   | .   | .   | .   | .   | .   | .   | .   | .   | .   | .   | .   | .   | T   | .   | . | . | C | . |   |   |   |   |
| SLvtHap13 | .  | .                                                            | .  | .  | T   | .   | C   | .   | C   | .   | G   | .   | C   | .   | .   | C   | .   | .   | G   | C   | T   | .   | .   | .   | .   | .   | .   | T   | .   | .   | .   | .   | .   | .   | .   | .   | C   | .   | .   | .   | .   | T   | .   | .   | . | . | . | . |   |   |   |   |
| SLvtHap14 | .  | .                                                            | .  | T  | T   | .   | C   | .   | C   | .   | G   | .   | C   | .   | .   | C   | .   | .   | G   | C   | T   | .   | .   | .   | .   | .   | .   | T   | .   | .   | .   | .   | .   | .   | .   | .   | C   | .   | .   | .   | .   | T   | .   | .   | . | . | . | . |   |   |   |   |
| SLvtHap15 | .  | .                                                            | T  | .  | T   | .   | C   | .   | C   | .   | G   | .   | C   | .   | .   | C   | .   | .   | G   | C   | T   | .   | .   | .   | .   | .   | .   | T   | .   | .   | .   | .   | .   | .   | .   | .   | C   | .   | .   | T   | .   | T   | .   | .   | . | . | . | . |   |   |   |   |
| SLvtHap16 | .  | .                                                            | .  | .  | T   | .   | C   | .   | C   | .   | .   | .   | C   | .   | .   | C   | .   | .   | .   | C   | T   | .   | .   | .   | .   | .   | .   | T   | .   | .   | .   | .   | .   | T   | .   | .   | .   | .   | .   | .   | .   | .   | T   | .   | . | . | . | . |   |   |   |   |
| SLvtHap17 | .  | .                                                            | .  | .  | T   | .   | C   | .   | C   | .   | G   | .   | C   | .   | .   | C   | .   | .   | .   | C   | T   | .   | .   | .   | .   | .   | .   | T   | .   | .   | .   | .   | .   | T   | .   | .   | .   | .   | .   | .   | .   | .   | T   | .   | . | . | . | . |   |   |   |   |
| SLvtHap18 | .  | .                                                            | .  | .  | T   | .   | C   | .   | C   | .   | .   | .   | C   | .   | .   | C   | .   | .   | .   | C   | T   | .   | .   | .   | .   | .   | .   | T   | .   | .   | .   | .   | .   | .   | G   | .   | .   | .   | .   | .   | .   | .   | T   | .   | . | . | . | . |   |   |   |   |
| SLvtHap19 | .  | .                                                            | .  | .  | T   | .   | C   | .   | C   | .   | .   | .   | C   | .   | .   | C   | .   | .   | .   | C   | T   | .   | .   | .   | .   | .   | .   | T   | .   | .   | .   | .   | .   | .   | G   | .   | .   | .   | .   | T   | .   | .   | .   | .   | . | . | . |   |   |   |   |   |
| SLvtHap20 | .  | .                                                            | .  | .  | T   | .   | C   | .   | C   | .   | .   | .   | C   | .   | .   | C   | .   | .   | .   | C   | T   | .   | .   | .   | .   | .   | .   | .   | .   | .   | .   | .   | .   | .   | .   | .   | .   | .   | .   | .   | .   | .   | T   | .   | . | . | . | . |   |   |   |   |
| SLvtHap21 | .  | .                                                            | .  | .  | T   | .   | C   | .   | .   | .   | .   | .   | C   | .   | .   | C   | .   | .   | .   | C   | T   | .   | .   | .   | .   | .   | .   | .   | .   | .   | .   | .   | .   | .   | .   | .   | .   | .   | .   | .   | .   | .   | T   | .   | . | . | . | . |   |   |   |   |
| SLvtHap22 | .  | .                                                            | .  | .  | T   | .   | C   | A   | .   | .   | .   | .   | C   | .   | .   | C   | .   | .   | .   | C   | T   | G   | .   | A   | T   | .   | .   | .   | T   | C   | .   | .   | .   | .   | .   | .   | .   | .   | .   | T   | .   | T   | .   | .   | T | . | . |   |   |   |   |   |
| SLvtHap23 | .  | .                                                            | .  | .  | T   | .   | C   | A   | .   | .   | .   | .   | C   | .   | .   | C   | .   | .   | .   | C   | T   | G   | .   | A   | T   | .   | .   | .   | T   | C   | .   | .   | .   | .   | .   | .   | .   | .   | .   | .   | T   | .   | T   | .   | . | . | . | . |   |   |   |   |
| SLvtHap24 | .  | .                                                            | .  | .  | T   | .   | C   | A   | .   | .   | .   | .   | C   | .   | .   | C   | .   | .   | .   | C   | T   | .   | .   | .   | .   | .   | .   | .   | T   | C   | .   | .   | .   | .   | .   | .   | .   | .   | .   | .   | .   | T   | .   | T   | . | . | . | . | . |   |   |   |
| SLvtHap25 | .  | .                                                            | T  | .  | T   | .   | C   | A   | .   | .   | .   | .   | C   | .   | .   | C   | .   | .   | .   | C   | T   | .   | .   | .   | .   | .   | .   | A   | T   | .   | .   | .   | .   | .   | .   | .   | .   | .   | .   | .   | .   | T   | .   | T   | . | . | . | . | . |   |   |   |
| SLvtHap26 | .  | .                                                            | .  | .  | T   | .   | C   | A   | .   | .   | .   | .   | C   | .   | .   | C   | .   | .   | .   | C   | T   | .   | .   | .   | .   | .   | .   | A   | T   | .   | T   | T   | C   | .   | .   | .   | .   | .   | .   | .   | .   | T   | .   | T   | . | . | . | . | . |   |   |   |
| SLvtHap27 | .  | .                                                            | .  | .  | T   | .   | C   | A   | .   | .   | .   | .   | C   | .   | .   | C   | .   | .   | .   | C   | T   | .   | .   | .   | .   | .   | .   | A   | T   | .   | T   | T   | C   | .   | .   | .   | .   | .   | .   | .   | .   | T   | A   | T   | . | . | . | . | . |   |   |   |
| SLvtHap28 | C  | T                                                            | .  | .  | T   | .   | C   | A   | .   | .   | .   | .   | C   | .   | .   | C   | .   | .   | .   | C   | T   | .   | .   | .   | .   | .   | .   | A   | T   | .   | T   | T   | C   | .   | .   | .   | .   | .   | .   | .   | .   | T   | .   | T   | . | . | . | . | . |   |   |   |
| SLvtHap29 | C  | .                                                            | .  | .  | T   | .   | C   | A   | .   | .   | .   | .   | C   | .   | .   | C   | .   | .   | .   | C   | T   | .   | .   | .   | .   | .   | .   | A   | T   | .   | .   | .   | .   | .   | .   | .   | .   | .   | .   | .   | .   | T   | .   | T   | . | . | . | . | . |   |   |   |
| SLvtHap30 | .  | .                                                            | .  | .  | T   | .   | C   | A   | .   | .   | .   | .   | C   | .   | .   | C   | .   | .   | .   | C   | T   | .   | .   | .   | .   | .   | .   | A   | T   | .   | .   | .   | .   | .   | .   | .   | G   | .   | .   | .   | .   | .   | .   | T   | . | . | . | . | . |   |   |   |
| SLvtHap31 | .  | .                                                            | .  | .  | T   | .   | C   | A   | .   | .   | .   | .   | C   | .   | .   | C   | .   | .   | .   | C   | T   | .   | .   | .   | .   | .   | .   | A   | T   | .   | .   | .   | .   | .   | .   | .   | .   | .   | .   | .   | .   | .   | T   | .   | . | . | . | . | . |   |   |   |
| SLvtHap32 | .  | .                                                            | .  | .  | T   | .   | C   | A   | .   | .   | .   | .   | C   | G   | .   | .   | .   | T   | .   | .   | .   | .   | .   | .   | .   | .   | .   | .   | .   | .   | .   | .   | .   | .   | .   | .   | .   | .   | .   | .   | .   | .   | .   | .   | . | . | . | . | . | . |   |   |
| SLvtHap33 | .  | .                                                            | .  | .  | T   | .   | C   | A   | .   | .   | .   | .   | C   | .   | .   | .   | .   | T   | .   | .   | .   | .   | .   | .   | .   | .   | .   | .   | .   | .   | .   | .   | .   | .   | .   | .   | .   | .   | .   | .   | .   | .   | .   | .   | . | . | . | . | . | . | . |   |
| SLvtHap34 | .  | .                                                            | .  | .  | T   | .   | C   | A   | .   | .   | .   | .   | C   | .   | .   | .   | .   | .   | .   | .   | .   | .   | .   | .   | .   | .   | .   | .   | .   | .   | .   | .   | .   | .   | .   | .   | .   | .   | .   | .   | .   | .   | .   | .   | . | . | . | . | . | . | . |   |
| SLvtHap35 | .  | .                                                            | .  | .  | .   | .   | .   | .   | .   | .   | .   | .   | .   | .   | .   | .   | .   | .   | .   | .   | .   | .   | .   | .   | .   | .   | .   | .   | .   | .   | .   | .   | .   | .   | .   | .   | .   | .   | .   | .   | .   | .   | .   | .   | . | . | . | . | . | . | . |   |
| SLvtHap36 | .  | .                                                            | .  | .  | .   | .   | C   | .   | .   | .   | .   | .   | .   | .   | .   | .   | .   | .   | .   | .   | .   | .   | .   | .   | .   | .   | .   | .   | .   | .   | .   | .   | .   | .   | .   | .   | .   | .   | .   | .   | .   | .   | .   | .   | . | . | . | . | . | . | . |   |
| SLvtHap37 | .  | .                                                            | .  | .  | T   | .   | C   | .   | .   | .   | .   | .   | C   | .   | .   | C   | C   | .   | .   | C   | T   | G   | .   | .   | .   | .   | C   | C   | T   | .   | .   | .   | .   | .   | .   | .   | .   | .   | .   | .   | .   | .   | .   | .   | . | . | . | . | . | . |   |   |
| SLvtHap38 | .  | .                                                            | T  | .  | T   | .   | C   | .   | .   | .   | .   | .   | C   | .   | .   | C   | .   | .   | .   | C   | T   | G   | .   | .   | .   | .   | C   | T   | .   | .   | .   | .   | .   | .   | .   | .   | .   | .   | .   | .   | .   | .   | .   | .   | . | . | . | . | . | . | . |   |
| SLvtHap39 | .  | .                                                            | .  | .  | T   | .   | C   | .   | .   | T   | .   | .   | C   | .   | .   | C   | .   | T   | .   | C   | T   | G   | .   | .   | .   | .   | C   | T   | .   | .   | .   | .   | .   | .   | .   | G   | .   | .   | .   | .   | .   | .   | .   | .   | . | . | . | . | . | . | . |   |
| SLvtHap40 | .  | .                                                            | .  | .  | T   | .   | C   | A   | .   | .   | .   | .   | C   | .   | .   | C   | .   | .   | .   | C   | T   | G   | .   | .   | .   | .   | C   | T   | .   | .   | .   | .   | .   | .   | .   | .   | .   | .   | .   | .   | .   | .   | .   | .   | . | . | . | . | . | . | . | . |
| SLvtHap41 | .  | .                                                            | .  | .  | T   | .   | C   | .   | .   | .   | .   | .   | C   | .   | .   | C   | .   | .   | .   | C   | T   | .   | .   | .   | .   | .   | .   | .   | .   | .   | .   | .   | .   | .   | .   | .   | .   | .   | .   | .   | .   | .   | .   | .   | . | . | . | . | . | . | . |   |
| SLvtHap42 | .  | .                                                            | .  | .  | T   | .   | C   | A   | .   | .   | .   | .   | C   | .   | A   | C   | .   | .   | .   | C   | .   | G   | .   | .   | .   | .   | .   | .   | .   | .   | .   | .   | .   | .   | .   | .   | .   | .   | .   | .   | .   | .   | .   | .   | . | . | . | . | . | . | . |   |

**Table S1b.** Haplotypes and substitution sites in the D-loop region (between 1-675 bp) of mtDNA of Ceylon Junglefowl

| Haplotype      | Sequence position<br>(according to GenBank Accession NC_007239) |          |          |          |          |          |          |          |          |          |          |          |          |          |          |          |          |          |          |          |          |
|----------------|-----------------------------------------------------------------|----------|----------|----------|----------|----------|----------|----------|----------|----------|----------|----------|----------|----------|----------|----------|----------|----------|----------|----------|----------|
|                | 72                                                              | 224      | 225      | 233      | 234      | 239      | 240      | 243      | 246      | 247      | 264      | 290      | 292      | 295      | 298      | 353      | 368      | 369      | 380      | 401      | 423      |
| <b>GenBank</b> | <b>C</b>                                                        | <b>C</b> | <b>T</b> | <b>C</b> | <b>C</b> | <b>A</b> | <b>T</b> | <b>T</b> | <b>T</b> | <b>T</b> | <b>C</b> | <b>C</b> | <b>T</b> | <b>A</b> | <b>C</b> | <b>T</b> | <b>C</b> | <b>T</b> | <b>G</b> | <b>T</b> | <b>T</b> |
| SLvtCJFHap1    | T                                                               | •        | C        | •        | •        | •        | C        | C        | •        | •        | •        | •        | C        | •        | T        | •        | •        | C        | •        | C        | C        |
| SLvtCJFHap2    | •                                                               | •        | •        | •        | •        | G        | C        | •        | •        | •        | T        | •        | •        | •        | T        | C        | •        | C        | •        | C        | C        |
| SLvtCJFHap3    | T                                                               | •        | •        | •        | •        | •        | •        | •        | C        | •        | T        | •        | C        | •        | T        | •        | •        | •        | •        | •        | C        |
| SLvtCJFHap4    | •                                                               | •        | •        | T        | •        | •        | •        | •        | C        | •        | T        | T        | C        | G        | T        | •        | T        | C        | •        | •        | C        |
| SLvtCJFHap5    | T                                                               | T        | •        | •        | •        | •        | •        | •        | •        | C        | T        | •        | •        | •        | •        | •        | •        | C        | A        | •        | •        |
| SLvtCJFHap6    | •                                                               | T        | •        | •        | T        | •        | •        | •        | •        | •        | T        | •        | •        | •        | T        | •        | •        | C        | A        | •        | •        |
